# Supplementary material for: Breastfed and Formula-Fed Infants: Need of a Different Complementary Feeding Model?
Source: MDPI journal article supplement (doi:10.3390/nu13113756), 2021-10-24
Supplement: s1 [file s1]

Menù 6-8 mesi

| Alimenti             | Gr     | Kcal                 | P           |
|----------------------|--------|----------------------|-------------|
| Latte materno        | 688    | 467,84               | 6,192       |
| cereali              | 25     | 88,75                | 2,5         |
| olio evo             | 10     | 89,9                 |             |
| verdure              | 20     |                      | 0,4         |
| vitello              | 10     | 10,7                 | 2,07        |
| frutta               | 40     | 16,8                 | 0,28        |
|                      | TOTALE | 673,99               | 11,442      |
|                      | KCAL   | 671,613              | 45,768      |
|                      | %      | più8% rispetto a 622 | 6,81        |
| 8,08Kg 6-9 mesi EFSA | g/kg   |                      | 1,42        |
|                      | PRI    |                      | 1,3g/Kg/die |

EFSA 77kcalorie /kg/die= 622

| <b>L</b> | <b>L sat.</b> | <b>CHO</b> | <b>Zuccheri</b> | <b>Fibra</b> | <b>Fe</b> | <b>Ca</b> | <b>Na</b> |
|----------|---------------|------------|-----------------|--------------|-----------|-----------|-----------|
| 24,08    | 10,8016       | 55,04      | 55,04           |              | 0,4128    | 158,24    |           |
| 0,325    | 0,075         | 18,55      |                 |              | 2,4       | 48,75     |           |
| 9,99     |               |            |                 |              | 0,02      |           |           |
| 0,06     |               | 0,56       | 0,52            | 0,38         | 0,18      | 9         | 8,4       |
| 0,27     | 0,12          |            |                 |              | 0,12      | 1,4       | 8,9       |
| 0,08     |               | 4          | 3,92            | 1,04         | 0,16      | 9,2       | 1,04      |
| 34,805   | 10,9966       | 78,15      | 59,48           | 1,42         | 3,2928    | 226,59    | 18,34     |
| 313,245  |               | 312,6      |                 |              |           |           |           |
| 46,64    |               | 46,54      |                 |              |           |           |           |

Menù 6-8 mesi

| Alimenti             | Gr     | Kcal     | P           | L        |
|----------------------|--------|----------|-------------|----------|
| F2                   | 688    | 464,4    | 10,32       | 22,0848  |
| cereali              | 25     | 88,75    | 2,5         | 0,325    |
| olio evo             | 10     | 89,9     |             | 9,99     |
| verdure              | 20     |          | 0,4         | 0,06     |
| vitello              | 10     | 10,7     | 2,07        | 0,27     |
| frutta               | 40     | 16,8     | 0,28        | 0,08     |
|                      | TOTALE | 670,55   | 15,57       | 32,8098  |
|                      | KCAL   | 674,2962 | 62,28       | 295,2882 |
|                      | %      |          | 9,24        | 43,79    |
| 8,08Kg 6-9 mesi EFSA | g/kg   |          | 1,93        |          |
|                      | PRI    |          | 1,3g/Kg/die |          |

| L sat. | CHO     | Zuccheri | Fibra | Fe     | Ca     | Na    |
|--------|---------|----------|-------|--------|--------|-------|
| 8,6688 | 56,072  | 41,6928  |       | 6,8112 | 481,6  |       |
| 0,075  | 18,55   |          |       | 2,4    | 48,75  |       |
|        |         |          |       | 0,02   |        |       |
|        | 0,56    | 0,52     | 0,38  | 0,18   | 9      | 8,4   |
| 0,12   |         |          |       | 0,12   | 1,4    | 8,9   |
|        | 4       | 3,92     | 1,04  | 0,16   | 9,2    | 1,04  |
| 8,8638 | 79,182  | 46,1328  | 1,42  | 9,6912 | 549,95 | 18,34 |
|        | 316,728 |          |       |        |        |       |
|        | 46,97   |          |       |        |        |       |

Menù 18 mesi

| Alimenti             | Gr     | Kcal     | P             | L       |
|----------------------|--------|----------|---------------|---------|
| F3                   | 488    | 295,728  | 8,1008        | 12,688  |
| pasta                | 30     | 102,3    | 4,05          | 0,36    |
| Petto di pollo       | 20     | 20       | 4,66          | 0,16    |
| olio evo             | 20     | 179,8    |               | 19,98   |
| verdure              | 60     |          | 1,2           | 0,18    |
| riso                 | 30     | 100,2    | 2,01          | 0,12    |
| piselli              | 30     | 18,3     | 1,62          | 0,09    |
| frutta               | 150    | 63       | 1,05          | 0,3     |
|                      | TOTALE | 779,328  | 22,6908       | 33,878  |
|                      | KCAL   | 772,9772 | 90,7632       | 304,902 |
|                      | %      |          | 11,74         | 39,45   |
| 10,55Kg 18 mesi EFSA | g/kg   |          | 2,15          |         |
|                      | PRI    |          | 1-1,3g/Kg/die |         |

| <b>L sat.</b> | <b>CHO</b> | <b>Zuccheri</b> | <b>Fibra</b> | <b>Fe</b> | <b>Ca</b> | <b>Na</b> |
|---------------|------------|-----------------|--------------|-----------|-----------|-----------|
| 4,148         | 29,768     | 29,28           |              | 4,88      | 400,16    |           |
| 0,06          | 21,81      | 0,66            | 0,51         | 0,42      | 6,6       | 1,2       |
| 0,06          |            |                 |              | 0,08      | 0,8       | 6,6       |
|               |            |                 |              | 0,04      |           |           |
|               | 1,68       | 1,56            | 1,14         | 0,54      | 27        | 25,2      |
| 0,03          | 24,12      | 0,06            | 0,3          | 0,24      | 7,2       | 1,5       |
|               | 1,95       | 1,2             | 1,89         | 0,6       | 6         | 38,7      |
|               | 15         | 14,7            | 3,9          | 0,6       | 34,5      | 3,9       |
| 4,298         | 94,328     | 47,46           | 7,74         | 7,4       | 482,26    | 77,1      |
|               | 377,312    |                 |              |           |           |           |
|               | 48,81      |                 |              |           |           |           |

Menù 18 mesi

| Alimenti             | Gr     | Kcal   | P             | L      |
|----------------------|--------|--------|---------------|--------|
| LV                   | 488    | 312,32 | 16,10         | 17,57  |
| pasta                | 30     | 102,30 | 4,05          | 0,36   |
| Petto di pollo       | 20     | 20,00  | 4,66          | 0,16   |
| olio evo             | 20     | 179,80 |               | 19,98  |
| verdure              | 60     |        | 1,20          | 0,18   |
| riso                 | 30     | 100,20 | 2,01          | 0,12   |
| piselli              | 30     | 18,30  | 1,62          | 0,09   |
| frutta               | 150    | 63,00  | 1,05          | 0,30   |
|                      | TOTALE | 795,92 | 30,69         | 38,76  |
|                      | KCAL   | 825,49 | 122,78        | 348,82 |
|                      | %      |        | 14,87         | 42,26  |
| 10,55Kg 18 mesi EFSA | g/kg   |        | 2,91          |        |
|                      | PRI    |        | 1-1,3g/Kg/die |        |

| <b>L sat.</b> | <b>CHO</b> | <b>Zuccheri</b> | <b>Fibra</b> | <b>Fe</b> | <b>Ca</b> | <b>Na</b> |
|---------------|------------|-----------------|--------------|-----------|-----------|-----------|
| 10,25         | 23,91      | 23,91           |              | 0,49      | 580,72    |           |
| 0,06          | 21,81      | 0,66            | 0,51         | 0,42      | 6,60      | 1,20      |
| 0,06          |            |                 |              | 0,08      | 0,80      | 6,60      |
|               |            |                 |              | 0,04      |           |           |
|               | 1,68       | 1,56            | 1,14         | 0,54      | 27,00     | 25,20     |
| 0,03          | 24,12      | 0,06            | 0,30         | 0,24      | 7,20      | 1,50      |
|               | 1,95       | 1,20            | 1,89         | 0,60      | 6,00      | 38,70     |
|               | 15,00      | 14,70           | 3,90         | 0,60      | 34,50     | 3,90      |
| 10,40         | 88,47      | 42,09           | 7,74         | 3,01      | 662,82    | 77,10     |
|               | 353,89     |                 |              |           |           |           |
|               | 42,87      |                 |              |           |           |           |



# Menù 18 mesi

| Alimenti             | Gr     | Kcal    | P             | L      |
|----------------------|--------|---------|---------------|--------|
| LM                   | 488    | 331,84  | 4,392         | 17,08  |
| pasta                | 30     | 102,3   | 4,05          | 0,36   |
| Petto di pollo       | 20     | 20      | 4,66          | 0,16   |
| olio evo             | 20     | 179,8   |               | 19,98  |
| verdure              | 60     |         | 1,2           | 0,18   |
| riso                 | 30     | 100,2   | 2,01          | 0,12   |
| piselli              | 30     | 18,3    | 1,62          | 0,09   |
| frutta               | 150    | 63      | 1,05          | 0,3    |
|                      | TOTALE | 815,44  | 18,982        | 38,27  |
|                      | KCAL   | 834,758 | 75,928        | 344,43 |
|                      | %      |         | 9,10          | 41,26  |
| 10,55Kg 18 mesi EFSA | g/kg   |         | 1,80          |        |
|                      | PRI    |         | 1-1,3g/Kg/die |        |

| <b>L sat.</b> | <b>CHO</b> | <b>Zuccheri</b> | <b>Fibra</b> | <b>Fe</b> | <b>Ca</b> | <b>Na</b> |
|---------------|------------|-----------------|--------------|-----------|-----------|-----------|
| 7,6616        | 39,04      | 39,04           |              | 0,2928    | 112,24    |           |
| 0,06          | 21,81      | 0,66            | 0,51         | 0,42      | 6,6       | 1,2       |
| 0,06          |            |                 |              | 0,08      | 0,8       | 6,6       |
|               |            |                 |              | 0,04      |           |           |
|               | 1,68       | 1,56            | 1,14         | 0,54      | 27        | 25,2      |
| 0,03          | 24,12      | 0,06            | 0,3          | 0,24      | 7,2       | 1,5       |
|               | 1,95       | 1,2             | 1,89         | 0,6       | 6         | 38,7      |
|               | 15         | 14,7            | 3,9          | 0,6       | 34,5      | 3,9       |
| 7,8116        | 103,6      | 57,22           | 7,74         | 2,8128    | 194,34    | 77,1      |
|               | 414,4      |                 |              |           |           |           |
|               | 49,64      |                 |              |           |           |           |
